# Supplementary material
Source: publisher figshare collection journal article supplement (https://acs.figshare.com/ndownloader/files/20087924)
Supplement: Supplementary file 1 [file 20087924]

## Sheet: gd lag time course
Fraction aa at each position
	Lib_0hr																							gd-1_2hr																							gd-2_2hr
	0	A	C	D	E	F	G	H	I	K	L	M	N	P	Q	R	S	T	V	W	Y				A	C	D	E	F	G	H	I	K	L	M	N	P	Q	R	S	T	V	W	Y				A	C
S	52	1.58145e-05	0.00284661	#	#	#	0.00510809	0.00216659	0.000426992	#	0.000411178	#	0.0016289	0.000110702	0.000616767	0.119273	0.510129	0.000221403	#	#	#		S	52	#	0.00296266	#	#	#	0.00558348	0.00240558	0.000417811	#	0.000329185	#	0.0021397	0.000151931	0.00065837	0.130041	0.540268	0.00026588	#	#	#		S	52	#	0.00355133
K	53	#	#	#	0.00385874	#	1.58145e-05	#	#	0.510129	#	0.00262521	0.000316291	#	9.48872e-05	0.0037006	#	0.000395363	4.74436e-05	#	#		K	53	#	#	#	0.00362103	#	1.2661e-05	#	#	0.540268	#	0.00263348	0.000329185	#	0.000240558	0.00368434	#	0.000316524	3.79829e-05	#	#		K	53	#	#
T	54	0.00317872	#	#	#	#	#	#	0.00083817	#	#	#	0.000237218	0.000411178	#	#	0.00158145	0.510129	#	#	#		T	54	0.00550751	#	#	#	#	#	#	0.00079764	#	#	#	0.00012661	0.000595065	#	#	0.00150665	0.540268	#	#	#		T	54	0.00619706	#
S	55	#	0.00243544	1.58145e-05	#	#	0.00401689	#	0.000474436	#	#	#	0.00156564	#	#	0.00104376	0.510129	0.000142331	1.58145e-05	#	#		S	55	#	0.00260816	3.79829e-05	#	#	0.00370966	#	0.000354507	#	#	#	0.00145601	#	#	0.000987554	0.540268	0.00012661	1.2661e-05	#	#		S	55	#	0.00236163
N	56	#	#	0.00387456	#	#	1.58145e-05	0.000363734	0.00200844	0.000205589	#	#	0.510129	#	#	#	0.00442807	0.00049025	1.58145e-05	#	0.00275173		N	56	#	#	0.00412747	#	#	1.2661e-05	0.000316524	0.00224099	0.00026588	#	#	0.540268	#	#	#	0.00888799	0.000519099	#	#	0.0026588		N	56	#	#
T	57	0.0049025	#	#	#	#	#	#	#	0.000332105	4.74436e-05	0.00286243	#	0.000426992	#	0.000205589	0.00156564	0.510129	1.58145e-05	#	#		T	57	0.00462125	#	#	#	#	#	#	#	0.000316524	1.2661e-05	0.00269678	#	0.00040515	#	0.000316524	0.00188648	0.540268	6.33048e-05	#	#		T	57	0.00449243	#
I	58	#	#	1.58145e-05	#	0.00202426	#	#	0.510129	#	0.000553508	0.000237218	0.00142331	3.16291e-05	#	#	0.000332105	0.00286243	0.0028308	#	#		I	58	#	#	#	#	0.00141803	#	#	0.540268	#	0.000822962	0.000291202	0.000316524	#	#	#	7.59657e-05	0.00253219	0.00255751	#	#		I	58	#	#
R	59	#	0.00398526	#	#	#	0.000300476	0.00202426	#	#	0.00066421	#	#	0.000458621	#	0.510129	0.00101213	#	#	#	#		R	59	#	0.00584936	#	#	#	8.86267e-05	0.00183584	#	#	0.00093691	#	#	0.000443133	#	0.540268	0.000873606	#	#	#	#		R	59	#	0.00513167
V	60	0.0046811	#	#	0.00170797	#	0.00102794	#	#	1.58145e-05	0.000537694	0.00273591	#	#	#	#	#	1.58145e-05	0.510129	#	#		V	60	0.00512769	#	#	0.000468455	#	0.000354507	#	#	#	0.000430472	0.0015573	#	#	#	#	#	2.53219e-05	0.540268	#	#		V	60	0.0050784	#
F	61	#	0.000221403	#	#	0.510129	#	3.16291e-05	0.00139168	#	0.00591463	#	#	1.58145e-05	#	#	0.00374804	1.58145e-05	0.000221403	#	0.00123353		F	61	#	0.000253219	#	#	0.540268	#	5.06438e-05	0.00106352	#	0.00611524	#	#	#	#	#	0.00426674	#	0.000189914	#	0.000962232		F	61	#	0.000337376
L	62	#	#	#	#	#	#	#	#	#	0.510129	0.000426992	#	0.00512391	0.00230892	0.000332105	#	#	0.000284661	#	#		L	62	#	#	#	#	#	#	#	#	#	0.540268	0.000569743	#	0.00125343	0.000493777	8.86267e-05	#	#	0.000493777	#	#		L	62	#	#
P	63	0.000284661	#	#	#	#	#	#	#	#	0.00343175	1.58145e-05	#	0.510129	0.000980501	0.000237218	0.00156564	0.000600952	#	#	#		P	63	0.000253219	#	#	#	#	#	#	#	#	0.00153198	#	#	0.540268	0.000506438	8.86267e-05	0.00067103	0.00053176	#	#	#		P	63	0.000266349	#
N	64	#	3.16291e-05	0.00268847	#	#	3.16291e-05	0.00034792	0.000948872	0.000569323	#	#	0.510129	#	#	#	0.00341594	3.16291e-05	#	#	0.0021824		N	64	#	#	0.0025955	#	#	#	0.000227897	0.000962232	0.000493777	#	#	0.540268	#	#	#	0.00344378	8.86267e-05	#	#	0.00164592		N	64	#	1.77566e-05
K	65	#	#	#	0.00245125	#	#	#	4.74436e-05	0.510129	#	0.00211915	0.000680025	#	0.000237218	0.00464947	1.58145e-05	0.000316291	#	1.58145e-05	#		K	65	#	#	#	0.00241824	#	#	#	2.53219e-05	0.540268	#	0.0020764	0.0011015	#	0.00012661	0.00489979	#	0.000291202	#	#	#		K	65	#	#
Q	66	#	#	#	7.90726e-05	#	#	0.00181867	#	0.000189774	0.001961	#	#	0.000300476	0.510129	0.00384293	#	#	#	#	#		Q	66	#	#	#	0.000227897	#	#	0.000886267	#	8.86267e-05	0.00187382	#	#	5.06438e-05	0.540268	0.00124077	#	#	#	#	#		Q	66	#	#
R	67	#	0.00265684	#	#	#	0.000363734	0.00210333	#	#	0.000616767	#	#	0.000379549	#	0.510129	0.000205589	#	#	#	#		R	67	#	0.00278541	#	#	#	0.00026588	0.00216502	#	#	0.000595065	#	#	6.33048e-05	#	0.540268	0.000215236	#	#	#	#		R	67	#	0.00269901
T	68	0.00213496	#	#	#	1.58145e-05	#	#	0.00123353	#	#	#	0.000189774	0.000537694	#	1.58145e-05	0.00240381	0.510129	#	#	#		T	68	0.00206374	#	#	#	#	#	#	0.000354507	#	#	#	0.000113949	0.000113949	#	#	0.00212704	0.540268	#	#	#		T	68	0.00205977	#
V	69	0.0034792	#	0.00183449	3.16291e-05	0.00049025	0.00049025	#	0.0017396	#	0.000300476	#	#	#	#	#	#	3.16291e-05	0.510129	#	#		V	69	0.00384893	#	0.00092425	1.2661e-05	0.000329185	0.00026588	#	0.00201309	#	0.00012661	#	#	#	#	#	#	7.59657e-05	0.540268	#	#		V	69	0.00424383	#
V	70	0.00480762	#	0.00134423	1.58145e-05	0.000205589	0.000268847	#	0.00224566	#	0.000395363	#	#	#	#	#	#	3.16291e-05	0.510129	#	#		V	70	0.00495043	#	0.000253219	#	0.000164592	0.000101288	#	0.00245622	#	0.000468455	#	#	#	#	#	#	1.2661e-05	0.540268	#	#		V	70	0.0045457	#
N	71	#	#	0.00237218	1.58145e-05	#	#	0.000189774	0.00112283	0.00150238	#	#	0.510129	#	#	#	0.00284661	0.000142331	#	#	0.00137586		N	71	#	#	0.00229163	#	#	#	0.000240558	0.00122811	0.00174721	#	#	0.540268	#	#	#	0.00270944	0.000113949	#	#	0.00159528		N	71	#	#
V	72	0.0053295	#	#	0.00253032	1.58145e-05	0.000790726	#	1.58145e-05	#	0.000300476	0.00136005	#	#	#	#	1.58145e-05	#	0.510129	#	#		V	72	0.00636846	#	#	0.00079764	1.2661e-05	0.000949571	#	#	#	0.000291202	0.00120279	#	#	#	#	2.53219e-05	#	0.540268	#	#		V	72	0.0060195	#
R	73	#	0.0028308	4.74436e-05	#	3.16291e-05	0.000442807	0.00373223	#	#	0.00066421	#	1.58145e-05	0.000553508	#	0.510129	0.00101213	#	#	#	#		R	73	#	0.00303863	3.79829e-05	#	#	0.000468455	0.00408949	#	#	0.000974893	#	2.53219e-05	0.000974893	#	0.540268	0.000911589	#	#	#	#		R	73	#	0.00300087
N	74	#	1.58145e-05	0.00439644	#	#	#	0.000253032	0.00164471	0.000363734	#	#	0.510129	#	#	#	0.00420666	0.000253032	#	#	0.00227729		N	74	#	1.2661e-05	0.00497575	#	#	#	0.000215236	0.00160794	0.000303863	#	#	0.540268	#	#	#	0.00408949	0.000227897	#	#	0.00274743		N	74	#	5.32699e-05
G	75	0.000521879	0.00170797	0.00132842	#	#	0.510129	#	#	#	#	#	#	#	#	0.000363734	0.00240381	#	0.000268847	#	1.58145e-05		G	75	0.000379829	0.00210172	0.00117747	#	#	0.540268	#	#	#	#	#	#	#	#	0.00026588	0.0025955	#	0.000443133	#	#		G	75	0.000390646	0.00209528
M	76	#	#	#	3.16291e-05	#	#	#	0.00210333	0.00241962	0.000917243	0.510129	#	#	#	0.000411178	#	0.00324198	0.00191356	#	#		M	76	#	#	#	#	#	#	#	0.00197511	0.00231695	0.000721674	0.540268	#	#	#	0.000354507	#	0.0040515	0.00192446	#	#		M	76	#	#
S	77	#	0.00110702	4.74436e-05	#	#	0.00438062	1.58145e-05	0.000205589	#	#	#	0.00104376	#	#	0.000853984	0.510129	0.000126516	#	#	#		S	77	#	0.00127876	#	#	#	0.0045706	#	0.000341846	#	#	#	0.00112682	#	#	0.000645709	0.540268	0.000164592	#	#	#		S	77	#	0.00122521
L	78	#	#	#	#	#	#	#	#	3.16291e-05	0.510129	0.000553508	#	0.00638907	0.0034792	0.000363734	#	#	6.32581e-05	#	#		L	78	#	#	#	#	#	#	#	#	#	0.540268	0.00067103	#	0.00113949	0.000620387	0.000113949	#	#	0.00012661	#	#		L	78	#	#
H	79	#	4.74436e-05	0.000300476	#	#	#	0.510129	#	#	0.00186611	#	0.000506065	0.000300476	0.00177123	0.00420666	3.16291e-05	#	#	#	0.00139168		H	79	#	3.79829e-05	0.000316524	#	#	#	0.540268	#	#	0.00172189	#	0.000379829	0.000164592	0.00257017	0.00415279	3.79829e-05	#	#	#	0.0015573		H	79	#	8.87831e-05
D	80	0.000506065	#	0.510129	0.00049025	#	0.00322616	6.32581e-05	#	#	#	#	0.0010912	#	#	1.58145e-05	#	#	0.00186611	#	0.000300476		D	80	0.000367168	#	0.540268	0.000354507	#	0.00344378	8.86267e-05	#	#	#	#	0.00115215	#	#	#	#	#	0.00172189	#	0.00039249		D	80	0.000639239	#
C	81	#	0.510129	#	#	0.000284661	0.000759097	#	1.58145e-05	#	#	#	#	#	#	0.00463366	0.0045704	#	#	0.000363734	0.00148657		C	81	#	0.540268	#	#	0.000316524	0.000633048	#	#	#	#	#	#	#	#	0.00359571	0.00467189	#	#	6.33048e-05	0.00158262		C	81	#	0.539926
L	82	1.58145e-05	#	#	#	#	#	#	#	#	0.510129	0.000442807	#	0.00529787	0.00298895	0.000648396	#	1.58145e-05	0.000237218	#	#		L	82	#	#	#	#	#	#	#	#	#	0.540268	0.000443133	#	0.00134206	0.000860945	0.000291202	#	1.2661e-05	0.000164592	#	#		L	82	#	#
M	83	6.32581e-05	#	#	#	#	#	#	0.00140749	0.00102794	0.00117028	0.510129	#	#	#	0.00034792	1.58145e-05	0.00417504	0.00362153	#	#		M	83	2.53219e-05	#	#	#	#	#	#	0.00135472	0.000848284	0.00143069	0.540268	#	#	#	0.000177253	#	0.00454528	0.00359571	#	#		M	83	3.55133e-05	#
K	84	#	#	3.16291e-05	0.00449133	#	6.32581e-05	#	0.00197682	0.510129	1.58145e-05	1.58145e-05	0.00124935	#	0.000110702	0.00550346	#	0.000221403	#	#	#		K	84	#	#	1.2661e-05	0.00140537	#	5.06438e-05	#	0.00117747	0.540268	#	1.2661e-05	0.00119013	#	0.000177253	0.00567211	#	0.00013927	#	#	#		K	84	#	#
A	85	0.510129	#	#	0.000205589	#	0.000205589	#	#	#	#	#	#	0.000253032	#	#	0.000363734	0.00102794	0.000964686	#	#		A	85	0.540268	#	#	0.00012661	#	0.000164592	#	#	#	#	#	#	0.00013927	#	#	0.000303863	0.000898928	0.000746996	#	#		A	85	0.539926	#
L	86	1.58145e-05	#	#	#	#	#	#	#	#	0.510129	0.000284661	#	0.00458621	0.00349501	0.000600952	#	#	0.000189774	#	#		L	86	#	#	#	#	#	#	#	#	#	0.540268	0.000215236	#	0.00122811	0.00125343	0.000189914	#	#	0.000151931	#	#		L	86	#	#
K	87	#	#	1.58145e-05	0.00501321	#	#	#	0.00136005	0.510129	#	1.58145e-05	0.00194519	#	0.000189774	0.00593045	1.58145e-05	0.000237218	#	#	#		K	87	#	#	2.53219e-05	0.00468455	#	#	#	0.00141803	0.540268	#	2.53219e-05	0.00360837	#	0.000227897	0.00536824	#	0.000278541	#	#	#		K	87	#	#
V	88	0.00396945	#	#	0.00216659	#	0.000442807	#	#	#	0.000379549	0.000506065	#	#	#	#	#	#	0.510129	1.58145e-05	#		V	88	0.00384893	#	#	0.0011015	#	0.000354507	#	#	#	0.000341846	0.000557082	#	#	#	#	#	#	0.540268	1.2661e-05	#		V	88	0.00411954	#
R	89	#	0.0034792	#	#	#	0.000442807	0.00227729	#	#	0.000142331	#	#	0.000237218	1.58145e-05	0.510129	0.000711654	#	#	#	1.58145e-05		R	89	#	0.000595065	#	#	#	0.00012661	0.000709013	#	#	6.33048e-05	#	#	0.000101288	#	0.540268	0.00040515	#	#	#	#		R	89	#	0.000656995
G	90	0.00017396	0.000126516	0.000506065	7.90726e-05	#	0.510129	#	#	#	#	#	#	#	#	0.000300476	0.000885614	#	9.48872e-05	#	#		G	90	0.000151931	0.000202575	0.000683691	6.33048e-05	#	0.540268	#	#	#	#	#	#	#	#	0.000253219	0.00102554	#	0.000101288	#	#		G	90	0.000266349	5.32699e-05
Fraction aa at position x at time t/Fraction aa at position x time 0
																								gd-1_2hr																							gd-2_2hr
																									A	C	D	E	F	G	H	I	K	L	M	N	P	Q	R	S	T	V	W	Y				A	C
																							S	52	#VALUE!	1.04077	#VALUE!	#VALUE!	#VALUE!	1.09307	1.11031	0.978499	#VALUE!	0.80059	#VALUE!	1.31359	1.37244	1.06745	1.09028	1.05908	1.20089	#VALUE!	#VALUE!	#VALUE!		S	52	#VALUE!	1.24756
																							K	53	#VALUE!	#VALUE!	#VALUE!	0.938396	#VALUE!	0.80059	#VALUE!	#VALUE!	1.05908	#VALUE!	1.00315	1.04077	#VALUE!	2.5352	0.995606	#VALUE!	0.80059	0.80059	#VALUE!	#VALUE!		K	53	#VALUE!	#VALUE!
																							T	54	1.73262	#VALUE!	#VALUE!	#VALUE!	#VALUE!	#VALUE!	#VALUE!	0.951645	#VALUE!	#VALUE!	#VALUE!	0.533727	1.44722	#VALUE!	#VALUE!	0.952702	1.05908	#VALUE!	#VALUE!	#VALUE!		T	54	1.94955	#VALUE!
																							S	55	#VALUE!	1.07092	2.40177	#VALUE!	#VALUE!	0.923515	#VALUE!	0.747217	#VALUE!	#VALUE!	#VALUE!	0.929978	#VALUE!	#VALUE!	0.946152	1.05908	0.889544	0.80059	#VALUE!	#VALUE!		S	55	#VALUE!	0.969695
																							N	56	#VALUE!	#VALUE!	1.06527	#VALUE!	#VALUE!	0.80059	0.870207	1.11578	1.29326	#VALUE!	#VALUE!	1.05908	#VALUE!	#VALUE!	#VALUE!	2.00719	1.05884	#VALUE!	#VALUE!	0.966229		N	56	#VALUE!	#VALUE!
																							T	57	0.94263	#VALUE!	#VALUE!	#VALUE!	#VALUE!	#VALUE!	#VALUE!	#VALUE!	0.953083	0.266863	0.942131	#VALUE!	0.948847	#VALUE!	1.5396	1.20493	1.05908	4.00295	#VALUE!	#VALUE!		T	57	0.916354	#VALUE!
																							I	58	#VALUE!	#VALUE!	#VALUE!	#VALUE!	0.700516	#VALUE!	#VALUE!	1.05908	#VALUE!	1.48681	1.22757	0.222386	#VALUE!	#VALUE!	#VALUE!	0.22874	0.88463	0.903459	#VALUE!	#VALUE!		I	58	#VALUE!	#VALUE!
																							R	59	#VALUE!	1.46775	#VALUE!	#VALUE!	#VALUE!	0.294954	0.906918	#VALUE!	#VALUE!	1.41056	#VALUE!	#VALUE!	0.966229	#VALUE!	1.05908	0.863136	#VALUE!	#VALUE!	#VALUE!	#VALUE!		R	59	#VALUE!	1.28766
																							V	60	1.0954	#VALUE!	#VALUE!	0.274276	#VALUE!	0.34487	#VALUE!	#VALUE!	#VALUE!	0.80059	0.569206	#VALUE!	#VALUE!	#VALUE!	#VALUE!	#VALUE!	1.60118	1.05908	#VALUE!	#VALUE!		V	60	1.08487	#VALUE!
																							F	61	#VALUE!	1.1437	#VALUE!	#VALUE!	1.05908	#VALUE!	1.60118	0.7642	#VALUE!	1.03392	#VALUE!	#VALUE!	#VALUE!	#VALUE!	#VALUE!	1.13839	#VALUE!	0.857775	#VALUE!	0.780062		F	61	#VALUE!	1.52381
																							L	62	#VALUE!	#VALUE!	#VALUE!	#VALUE!	#VALUE!	#VALUE!	#VALUE!	#VALUE!	#VALUE!	1.05908	1.33432	#VALUE!	0.244625	0.213856	0.266863	#VALUE!	#VALUE!	1.73461	#VALUE!	#VALUE!		L	62	#VALUE!	#VALUE!
																							P	63	0.889544	#VALUE!	#VALUE!	#VALUE!	#VALUE!	#VALUE!	#VALUE!	#VALUE!	#VALUE!	0.446412	#VALUE!	#VALUE!	1.05908	0.51651	0.373609	0.428599	0.884863	#VALUE!	#VALUE!	#VALUE!		P	63	0.935671	#VALUE!
																							N	64	#VALUE!	#VALUE!	0.965417	#VALUE!	#VALUE!	#VALUE!	0.655028	1.01408	0.867306	#VALUE!	#VALUE!	1.05908	#VALUE!	#VALUE!	#VALUE!	1.00815	2.80207	#VALUE!	#VALUE!	0.754179		N	64	#VALUE!	0.561402
																							K	65	#VALUE!	#VALUE!	#VALUE!	0.986533	#VALUE!	#VALUE!	#VALUE!	0.533727	1.05908	#VALUE!	0.979827	1.6198	#VALUE!	0.533727	1.05384	#VALUE!	0.920679	#VALUE!	#VALUE!	#VALUE!		K	65	#VALUE!	#VALUE!
																							Q	66	#VALUE!	#VALUE!	#VALUE!	2.88212	#VALUE!	#VALUE!	0.487316	#VALUE!	0.467011	0.955543	#VALUE!	#VALUE!	0.168545	1.05908	0.322872	#VALUE!	#VALUE!	#VALUE!	#VALUE!	#VALUE!		Q	66	#VALUE!	#VALUE!
																							R	67	#VALUE!	1.04839	#VALUE!	#VALUE!	#VALUE!	0.730973	1.02933	#VALUE!	#VALUE!	0.964814	#VALUE!	#VALUE!	0.16679	#VALUE!	1.05908	1.04693	#VALUE!	#VALUE!	#VALUE!	#VALUE!		R	67	#VALUE!	1.01587
																							T	68	0.966638	#VALUE!	#VALUE!	#VALUE!	#VALUE!	#VALUE!	#VALUE!	0.287391	#VALUE!	#VALUE!	#VALUE!	0.600443	0.211921	#VALUE!	#VALUE!	0.884863	1.05908	#VALUE!	#VALUE!	#VALUE!		T	68	0.96478	#VALUE!
																							V	69	1.10627	#VALUE!	0.50382	0.400295	0.671463	0.542335	#VALUE!	1.15722	#VALUE!	0.421363	#VALUE!	#VALUE!	#VALUE!	#VALUE!	#VALUE!	#VALUE!	2.40177	1.05908	#VALUE!	#VALUE!		V	69	1.21977	#VALUE!
																							V	70	1.02971	#VALUE!	0.188374	#VALUE!	0.80059	0.376748	#VALUE!	1.09376	#VALUE!	1.18487	#VALUE!	#VALUE!	#VALUE!	#VALUE!	#VALUE!	#VALUE!	0.400295	1.05908	#VALUE!	#VALUE!		V	70	0.94552	#VALUE!
																							N	71	#VALUE!	#VALUE!	0.966045	#VALUE!	#VALUE!	#VALUE!	1.2676	1.09376	1.16296	#VALUE!	#VALUE!	1.05908	#VALUE!	#VALUE!	#VALUE!	0.951813	0.80059	#VALUE!	#VALUE!	1.15948		N	71	#VALUE!	#VALUE!
																							V	72	1.19495	#VALUE!	#VALUE!	0.315232	0.80059	1.20089	#VALUE!	#VALUE!	#VALUE!	0.969135	0.884373	#VALUE!	#VALUE!	#VALUE!	#VALUE!	1.60118	#VALUE!	1.05908	#VALUE!	#VALUE!		V	72	1.12947	#VALUE!
																							R	73	#VALUE!	1.07342	0.80059	#VALUE!	#VALUE!	1.05792	1.09572	#VALUE!	#VALUE!	1.46775	#VALUE!	1.60118	1.7613	#VALUE!	1.05908	0.900664	#VALUE!	#VALUE!	#VALUE!	#VALUE!		R	73	#VALUE!	1.06008
																							N	74	#VALUE!	0.80059	1.13177	#VALUE!	#VALUE!	#VALUE!	0.850627	0.977644	0.835398	#VALUE!	#VALUE!	1.05908	#VALUE!	#VALUE!	#VALUE!	0.972145	0.900664	#VALUE!	#VALUE!	1.20644		N	74	#VALUE!	3.36841
																							G	75	0.727809	1.23054	0.886368	#VALUE!	#VALUE!	1.05908	#VALUE!	#VALUE!	#VALUE!	#VALUE!	#VALUE!	#VALUE!	#VALUE!	#VALUE!	0.730973	1.07974	#VALUE!	1.64827	#VALUE!	#VALUE!		G	75	0.748537	1.22677
																							M	76	#VALUE!	#VALUE!	#VALUE!	#VALUE!	#VALUE!	#VALUE!	#VALUE!	0.939038	0.957568	0.786787	1.05908	#VALUE!	#VALUE!	#VALUE!	0.862174	#VALUE!	1.2497	1.0057	#VALUE!	#VALUE!		M	76	#VALUE!	#VALUE!
																							S	77	#VALUE!	1.15514	#VALUE!	#VALUE!	#VALUE!	1.04337	#VALUE!	1.66276	#VALUE!	#VALUE!	#VALUE!	1.07958	#VALUE!	#VALUE!	0.756113	1.05908	1.30096	#VALUE!	#VALUE!	#VALUE!		S	77	#VALUE!	1.10676
																							L	78	#VALUE!	#VALUE!	#VALUE!	#VALUE!	#VALUE!	#VALUE!	#VALUE!	#VALUE!	#VALUE!	1.05908	1.21232	#VALUE!	0.178349	0.178313	0.313274	#VALUE!	#VALUE!	2.00148	#VALUE!	#VALUE!		L	78	#VALUE!	#VALUE!
																							H	79	#VALUE!	0.80059	1.05341	#VALUE!	#VALUE!	#VALUE!	1.05908	#VALUE!	#VALUE!	0.922714	#VALUE!	0.750553	0.547772	1.45107	0.987194	1.20089	#VALUE!	#VALUE!	#VALUE!	1.11901		H	79	#VALUE!	1.87134
																							D	80	0.725535	#VALUE!	1.05908	0.723114	#VALUE!	1.06745	1.40103	#VALUE!	#VALUE!	#VALUE!	#VALUE!	1.05585	#VALUE!	#VALUE!	#VALUE!	#VALUE!	#VALUE!	0.922714	#VALUE!	1.30623		D	80	1.26316	#VALUE!
																							C	81	#VALUE!	1.05908	#VALUE!	#VALUE!	1.11193	0.833948	#VALUE!	#VALUE!	#VALUE!	#VALUE!	#VALUE!	#VALUE!	#VALUE!	#VALUE!	0.775998	1.02221	#VALUE!	#VALUE!	0.174041	1.06461		C	81	#VALUE!	1.05841
																							L	82	#VALUE!	#VALUE!	#VALUE!	#VALUE!	#VALUE!	#VALUE!	#VALUE!	#VALUE!	#VALUE!	1.05908	1.00074	#VALUE!	0.253321	0.288043	0.449111	#VALUE!	0.80059	0.693845	#VALUE!	#VALUE!		L	82	#VALUE!	#VALUE!
																							M	83	0.400295	#VALUE!	#VALUE!	#VALUE!	#VALUE!	#VALUE!	#VALUE!	0.962507	0.825224	1.22252	1.05908	#VALUE!	#VALUE!	#VALUE!	0.509466	#VALUE!	1.08868	0.992871	#VALUE!	#VALUE!		M	83	0.561402	#VALUE!
																							K	84	#VALUE!	#VALUE!	0.400295	0.312907	#VALUE!	0.80059	#VALUE!	0.595639	1.05908	#VALUE!	0.80059	0.952601	#VALUE!	1.60118	1.03064	#VALUE!	0.629035	#VALUE!	#VALUE!	#VALUE!		K	84	#VALUE!	#VALUE!
																							A	85	1.05908	#VALUE!	#VALUE!	0.615838	#VALUE!	0.80059	#VALUE!	#VALUE!	#VALUE!	#VALUE!	#VALUE!	#VALUE!	0.550406	#VALUE!	#VALUE!	0.835398	0.874491	0.774341	#VALUE!	#VALUE!		A	85	1.05841	#VALUE!
																							L	86	#VALUE!	#VALUE!	#VALUE!	#VALUE!	#VALUE!	#VALUE!	#VALUE!	#VALUE!	#VALUE!	1.05908	0.756113	#VALUE!	0.267784	0.358635	0.316022	#VALUE!	#VALUE!	0.80059	#VALUE!	#VALUE!		L	86	#VALUE!	#VALUE!
																							K	87	#VALUE!	#VALUE!	1.60118	0.934443	#VALUE!	#VALUE!	#VALUE!	1.04263	1.05908	#VALUE!	1.60118	1.85503	#VALUE!	1.20089	0.9052	#VALUE!	1.1742	#VALUE!	#VALUE!	#VALUE!		K	87	#VALUE!	#VALUE!
																							V	88	0.969639	#VALUE!	#VALUE!	0.508404	#VALUE!	0.80059	#VALUE!	#VALUE!	#VALUE!	0.900664	1.10081	#VALUE!	#VALUE!	#VALUE!	#VALUE!	#VALUE!	#VALUE!	1.05908	0.80059	#VALUE!		V	88	1.03781	#VALUE!
																							R	89	#VALUE!	0.171035	#VALUE!	#VALUE!	#VALUE!	0.285925	0.311341	#VALUE!	#VALUE!	0.444772	#VALUE!	#VALUE!	0.426981	#VALUE!	1.05908	0.569308	#VALUE!	#VALUE!	#VALUE!	#VALUE!		R	89	#VALUE!	0.188835
																							G	90	0.873371	1.60118	1.351	0.80059	#VALUE!	1.05908	#VALUE!	#VALUE!	#VALUE!	#VALUE!	#VALUE!	#VALUE!	#VALUE!	#VALUE!	0.842726	1.158	#VALUE!	1.06745	#VALUE!	#VALUE!		G	90	1.5311	0.421052
Relative enrichment = log10[(fraction aa at position x at time t/fraction aa at position x at time 0)/(wt aa fraction at position x at time t/wt aa fraction at position x at time 0)]
																								gd-1_2hr																							gd-2_2hr
																									A	C	D	E	F	G	H	I	K	L	M	N	P	Q	R	S	T	V	W	Y				A	C
																							S	52	#VALUE!	-0.00757567	#VALUE!	#VALUE!	#VALUE!	0.013717	0.020514	-0.0343688	#VALUE!	-0.121519	#VALUE!	0.0935305	0.112564	0.00341971	0.0126072	0	0.0545722	#VALUE!	#VALUE!	#VALUE!		S	52	#VALUE!	0.0714079
																							K	53	#VALUE!	#VALUE!	#VALUE!	-0.0525428	#VALUE!	-0.121519	#VALUE!	#VALUE!	0	#VALUE!	-0.0235638	-0.00757567	#VALUE!	0.379083	-0.0268419	#VALUE!	-0.121519	-0.121519	#VALUE!	#VALUE!		K	53	#VALUE!	#VALUE!
																							T	54	0.213774	#VALUE!	#VALUE!	#VALUE!	#VALUE!	#VALUE!	#VALUE!	-0.0464543	#VALUE!	#VALUE!	#VALUE!	-0.29761	0.135605	#VALUE!	#VALUE!	-0.0459721	0	#VALUE!	#VALUE!	#VALUE!		T	54	0.26528	#VALUE!
																							S	55	#VALUE!	0.00482748	0.355602	#VALUE!	#VALUE!	-0.0594851	#VALUE!	-0.151482	#VALUE!	#VALUE!	#VALUE!	-0.0564564	#VALUE!	#VALUE!	-0.0489684	0	-0.0757615	-0.121519	#VALUE!	#VALUE!		S	55	#VALUE!	-0.0380187
																							N	56	#VALUE!	#VALUE!	0.00253249	#VALUE!	#VALUE!	-0.121519	-0.0853069	0.0226505	0.0867569	#VALUE!	#VALUE!	0	#VALUE!	#VALUE!	#VALUE!	0.27766	-9.68612e-05	#VALUE!	#VALUE!	-0.039849		N	56	#VALUE!	#VALUE!
																							T	57	-0.0505879	#VALUE!	#VALUE!	#VALUE!	#VALUE!	#VALUE!	#VALUE!	#VALUE!	-0.0457983	-0.59864	-0.050818	#VALUE!	-0.0477328	#VALUE!	0.162478	0.056032	0	0.577451	#VALUE!	#VALUE!		T	57	-0.0625908	#VALUE!
																							I	58	#VALUE!	#VALUE!	#VALUE!	#VALUE!	-0.179511	#VALUE!	#VALUE!	0	#VALUE!	0.147326	0.0641176	-0.677822	#VALUE!	#VALUE!	#VALUE!	-0.665587	-0.0781676	-0.0690207	#VALUE!	#VALUE!		I	58	#VALUE!	#VALUE!
																							R	59	#VALUE!	0.141722	#VALUE!	#VALUE!	#VALUE!	-0.555175	-0.067361	#VALUE!	#VALUE!	0.124463	#VALUE!	#VALUE!	-0.039849	#VALUE!	0	-0.0888499	#VALUE!	#VALUE!	#VALUE!	#VALUE!		R	59	#VALUE!	0.0851477
																							V	60	0.0146443	#VALUE!	#VALUE!	-0.586741	#VALUE!	-0.487274	#VALUE!	#VALUE!	#VALUE!	-0.121519	-0.26966	#VALUE!	#VALUE!	#VALUE!	#VALUE!	#VALUE!	0.179511	0	#VALUE!	#VALUE!		V	60	0.0107247	#VALUE!
																							F	61	#VALUE!	0.0333829	#VALUE!	#VALUE!	0	#VALUE!	0.179511	-0.141722	#VALUE!	-0.0104435	#VALUE!	#VALUE!	#VALUE!	#VALUE!	#VALUE!	0.0313625	#VALUE!	-0.0915558	#VALUE!	-0.1328		F	61	#VALUE!	0.158276
																							L	62	#VALUE!	#VALUE!	#VALUE!	#VALUE!	#VALUE!	#VALUE!	#VALUE!	#VALUE!	#VALUE!	0	0.10033	#VALUE!	-0.636429	-0.694807	-0.59864	#VALUE!	#VALUE!	0.214273	#VALUE!	#VALUE!		L	62	#VALUE!	#VALUE!
																							P	63	-0.0757615	#VALUE!	#VALUE!	#VALUE!	#VALUE!	#VALUE!	#VALUE!	#VALUE!	#VALUE!	-0.375193	#VALUE!	#VALUE!	0	-0.311851	-0.452512	-0.392878	-0.0780533	#VALUE!	#VALUE!	#VALUE!		P	63	-0.0535308	#VALUE!
																							N	64	#VALUE!	#VALUE!	-0.0402141	#VALUE!	#VALUE!	#VALUE!	-0.208669	-0.0188567	-0.0867569	#VALUE!	#VALUE!	0	#VALUE!	#VALUE!	#VALUE!	-0.0214039	0.422549	#VALUE!	#VALUE!	-0.147455		N	64	#VALUE!	-0.27538
																							K	65	#VALUE!	#VALUE!	#VALUE!	-0.0308174	#VALUE!	#VALUE!	#VALUE!	-0.29761	0	#VALUE!	-0.03378	0.184532	#VALUE!	-0.29761	-0.00215539	#VALUE!	-0.0608212	#VALUE!	#VALUE!	#VALUE!		K	65	#VALUE!	#VALUE!
																							Q	66	#VALUE!	#VALUE!	#VALUE!	0.434783	#VALUE!	#VALUE!	-0.337119	#VALUE!	-0.355602	-0.044679	#VALUE!	#VALUE!	-0.798213	0	-0.515899	#VALUE!	#VALUE!	#VALUE!	#VALUE!	#VALUE!		Q	66	#VALUE!	#VALUE!
																							R	67	#VALUE!	-0.00440563	#VALUE!	#VALUE!	#VALUE!	-0.161028	-0.0123746	#VALUE!	#VALUE!	-0.0404858	#VALUE!	#VALUE!	-0.80276	#VALUE!	0	-0.00501346	#VALUE!	#VALUE!	#VALUE!	#VALUE!		R	67	#VALUE!	-0.0178153
																							T	68	-0.0396652	#VALUE!	#VALUE!	#VALUE!	#VALUE!	#VALUE!	#VALUE!	-0.566456	#VALUE!	#VALUE!	#VALUE!	-0.246458	-0.698755	#VALUE!	#VALUE!	-0.0780533	0	#VALUE!	#VALUE!	#VALUE!		T	68	-0.0402254	#VALUE!
																							V	69	0.0189319	#VALUE!	-0.322654	-0.422549	-0.197907	-0.290661	#VALUE!	0.0384854	#VALUE!	-0.400273	#VALUE!	#VALUE!	#VALUE!	#VALUE!	#VALUE!	#VALUE!	0.355602	0	#VALUE!	#VALUE!		V	69	0.0616256	#VALUE!
																							V	70	-0.0122159	#VALUE!	-0.749908	#VALUE!	-0.121519	-0.448878	#VALUE!	0.0139944	#VALUE!	0.0487427	#VALUE!	#VALUE!	#VALUE!	#VALUE!	#VALUE!	#VALUE!	-0.422549	0	#VALUE!	#VALUE!		V	70	-0.0489832	#VALUE!
																							N	71	#VALUE!	#VALUE!	-0.0399317	#VALUE!	#VALUE!	#VALUE!	0.0780533	0.0139944	0.0406365	#VALUE!	#VALUE!	0	#VALUE!	#VALUE!	#VALUE!	-0.0463778	-0.121519	#VALUE!	#VALUE!	0.0393323		N	71	#VALUE!	#VALUE!
																							V	72	0.0524191	#VALUE!	#VALUE!	-0.526298	-0.121519	0.0545722	#VALUE!	#VALUE!	#VALUE!	-0.0385448	-0.0782939	#VALUE!	#VALUE!	#VALUE!	#VALUE!	0.179511	#VALUE!	0	#VALUE!	#VALUE!		V	72	0.0282202	#VALUE!
																							R	73	#VALUE!	0.00583919	-0.121519	#VALUE!	#VALUE!	-0.000475331	0.0147715	#VALUE!	#VALUE!	0.141722	#VALUE!	0.179511	0.220904	#VALUE!	0	-0.0703665	#VALUE!	#VALUE!	#VALUE!	#VALUE!		R	73	#VALUE!	0.000684074
																							N	74	#VALUE!	-0.121519	0.0288287	#VALUE!	#VALUE!	#VALUE!	-0.0951901	-0.0347486	-0.103036	#VALUE!	#VALUE!	0	#VALUE!	#VALUE!	#VALUE!	-0.0371981	-0.0703665	#VALUE!	#VALUE!	0.0565782		N	74	#VALUE!	0.502772
																							G	75	-0.162912	0.0651653	-0.0773154	#VALUE!	#VALUE!	0	#VALUE!	#VALUE!	#VALUE!	#VALUE!	#VALUE!	#VALUE!	#VALUE!	#VALUE!	-0.161028	0.00839125	#VALUE!	0.1921	#VALUE!	#VALUE!		G	75	-0.150441	0.0641087
																							M	76	#VALUE!	#VALUE!	#VALUE!	#VALUE!	#VALUE!	#VALUE!	#VALUE!	-0.0522461	-0.0437594	-0.129072	0	#VALUE!	#VALUE!	#VALUE!	-0.0893343	#VALUE!	0.0718771	-0.0224608	#VALUE!	#VALUE!		M	76	#VALUE!	#VALUE!
																							S	77	#VALUE!	0.0377043	#VALUE!	#VALUE!	#VALUE!	-0.00649159	#VALUE!	0.195901	#VALUE!	#VALUE!	#VALUE!	0.00832705	#VALUE!	#VALUE!	-0.146343	0	0.0893343	#VALUE!	#VALUE!	#VALUE!		S	77	#VALUE!	0.0194015
																							L	78	#VALUE!	#VALUE!	#VALUE!	#VALUE!	#VALUE!	#VALUE!	#VALUE!	#VALUE!	#VALUE!	0	0.0586888	#VALUE!	-0.773658	-0.773746	-0.529004	#VALUE!	#VALUE!	0.276421	#VALUE!	#VALUE!		L	78	#VALUE!	#VALUE!
																							H	79	#VALUE!	-0.121519	-0.00233262	#VALUE!	#VALUE!	#VALUE!	0	#VALUE!	#VALUE!	-0.0598621	#VALUE!	-0.149548	-0.286329	0.136759	-0.0305268	0.0545722	#VALUE!	#VALUE!	#VALUE!	0.0239034		H	79	#VALUE!	0.247499
																							D	80	-0.164271	#VALUE!	0	-0.165723	#VALUE!	0.00341971	0.121519	#VALUE!	#VALUE!	#VALUE!	#VALUE!	-0.00132672	#VALUE!	#VALUE!	#VALUE!	#VALUE!	#VALUE!	-0.0598621	#VALUE!	0.0910891		D	80	0.0768029	#VALUE!
																							C	81	#VALUE!	0	#VALUE!	#VALUE!	0.0211485	-0.10379	#VALUE!	#VALUE!	#VALUE!	#VALUE!	#VALUE!	#VALUE!	#VALUE!	#VALUE!	-0.135068	-0.0153905	#VALUE!	#VALUE!	-0.784277	0.00226314		C	81	#VALUE!	0
																							L	82	#VALUE!	#VALUE!	#VALUE!	#VALUE!	#VALUE!	#VALUE!	#VALUE!	#VALUE!	#VALUE!	0	-0.024609	#VALUE!	-0.621258	-0.565472	-0.372575	#VALUE!	-0.121519	-0.183667	#VALUE!	#VALUE!		L	82	#VALUE!	#VALUE!
																							M	83	-0.422549	#VALUE!	#VALUE!	#VALUE!	#VALUE!	#VALUE!	#VALUE!	-0.0415253	-0.108358	0.0623277	0	#VALUE!	#VALUE!	#VALUE!	-0.317814	#VALUE!	0.0119715	-0.0280362	#VALUE!	#VALUE!		M	83	-0.27538	#VALUE!
																							K	84	#VALUE!	#VALUE!	-0.422549	-0.529514	#VALUE!	-0.121519	#VALUE!	-0.249946	0	#VALUE!	-0.121519	-0.0460183	#VALUE!	0.179511	-0.0118203	#VALUE!	-0.226254	#VALUE!	#VALUE!	#VALUE!		K	84	#VALUE!	#VALUE!
																							A	85	0	#VALUE!	#VALUE!	-0.235462	#VALUE!	-0.121519	#VALUE!	#VALUE!	#VALUE!	#VALUE!	#VALUE!	#VALUE!	-0.284246	#VALUE!	#VALUE!	-0.103036	-0.083174	-0.135997	#VALUE!	#VALUE!		A	85	0	#VALUE!
																							L	86	#VALUE!	#VALUE!	#VALUE!	#VALUE!	#VALUE!	#VALUE!	#VALUE!	#VALUE!	#VALUE!	0	-0.146343	#VALUE!	-0.597145	-0.470276	-0.525211	#VALUE!	#VALUE!	-0.121519	#VALUE!	#VALUE!		L	86	#VALUE!	#VALUE!
																							K	87	#VALUE!	#VALUE!	0.179511	-0.0543766	#VALUE!	#VALUE!	#VALUE!	-0.00679945	0	#VALUE!	0.179511	0.243421	#VALUE!	0.0545722	-0.0681844	#VALUE!	0.0448124	#VALUE!	#VALUE!	#VALUE!		K	87	#VALUE!	#VALUE!
																							V	88	-0.0383192	#VALUE!	#VALUE!	-0.31872	#VALUE!	-0.121519	#VALUE!	#VALUE!	#VALUE!	-0.0703665	0.0167837	#VALUE!	#VALUE!	#VALUE!	#VALUE!	#VALUE!	#VALUE!	0	-0.121519	#VALUE!		V	88	-0.00853534	#VALUE!
																							R	89	#VALUE!	-0.791844	#VALUE!	#VALUE!	#VALUE!	-0.568677	-0.531693	#VALUE!	#VALUE!	-0.376792	#VALUE!	#VALUE!	-0.39452	#VALUE!	0	-0.269582	#VALUE!	#VALUE!	#VALUE!	#VALUE!		R	89	#VALUE!	-0.748571
																							G	90	-0.0837305	0.179511	0.105725	-0.121519	#VALUE!	0	#VALUE!	#VALUE!	#VALUE!	#VALUE!	#VALUE!	#VALUE!	#VALUE!	#VALUE!	-0.0992426	0.038778	#VALUE!	0.00341971	#VALUE!	#VALUE!		G	90	0.160349	-0.400318
Relative enrichment**corrected values based on using altered frequency for variants that disappeared below the noise threshold, but were present at 0 h
																								gd-1_2hr																							gd-2_2hr
	WT = wt amino acid																								A	C	D	E	F	G	H	I	K	L	M	N	P	Q	R	S	T	V	W	Y				A	C
	# = no data available																						S	52	-0.12151902413445495	-0.007575671827618168	#	#	#	0.013717043002280641	0.02051400966196722	-0.03436884841555476	#	-0.12151902413445495	#	0.09353045577404634	0.11256418189891297	0.003419712473844996	0.012607177015367446	WT	0.05457223492122629	#	#	#		S	52	0.025650400095356178	0.07140789065603127
	#DIV/0 = no data present at 0 h																						K	53	#	#	#	-0.05254281734414136	#	-0.12151902413445495	#	#	WT	#	-0.023563777211748516	-0.007575671827618168	#	0.3790833264347303	-0.026841892558690492	#	-0.12151902413445495	-0.12151902413445495	#	#		K	53	#	#
	value = calculated relative enrichment																						T	54	0.21377417539969348	#	#	#	#	#	#DIV/0	-0.04645434428166234	#	#DIV/0	#	-0.2976102831901362	0.13560548583044452	#	#	-0.04597206274192421	WT	#DIV/0	#	#		T	54	0.2652797696340472	#DIV/0
																							S	55	#	0.0048274753982352914	0.35560223058520746	#	#	-0.05948512040028357	#	-0.15148224751189818	#DIV/0	#	#	-0.0564563783783932	#	#	-0.04896835698584319	WT	-0.07576153357377981	-0.12151902413445495	#	#		S	55	#	-0.03801867977402112
																							N	56	#	#DIV/0	0.0025324915689515183	#	#	-0.12151902413445495	-0.08530685148001026	0.022650521271394823	0.08675691829262756	#	#	WT	#	#	#	0.2776600566531311	-9.686124899215005e-05	-0.12151902413445495	#	-0.03984897768313541		N	56	#	#DIV/0
																							T	57	-0.05058785351225292	#	#	#	#	#	#	#	-0.04579831019633661	-0.5986402788541174	-0.05081799556490173	#	-0.047732809973536315	#	0.16247763223074588	0.056032049680269175	WT	0.5774509802015638	#	#		T	57	-0.06259077256309858	#
																							I	58	#	#	-0.12151902413445495	#	-0.17951097111214176	#	#	WT	#	0.147326288158125	0.06411755282745667	-0.6778215249017422	-0.4225490197984362	#	#DIV/0	-0.6655870684847306	-0.07816760333965823	-0.06902068566772436	#	#		I	58	#DIV/0	#DIV/0
																							R	59	#	0.14172241064012644	#	#	#	-0.5551745850730271	-0.06736099154734841	#	#	0.12446340519862079	#	#	-0.03984897768313541	#	WT	-0.0888499073810868	#	#	#	#DIV/0		R	59	#	0.08514770207035988
																							V	60	0.01464428802127496	#	#	-0.5867410555544096	#	-0.4872743494350913	#	#DIV/0	-0.12151902413445495	-0.12151902413445495	-0.2696600158238524	#	#	#	#	#	0.17951097152952625	WT	#	#		V	60	0.010724722165460599	#
																							F	61	#	0.03338293585128824	#	#	WT	#	0.17951097152952625	-0.14172241022274193	#	-0.010443495583422972	#	#	-0.12151902413445495	#	#	0.03136253072677976	-0.12151902413445495	-0.09155580075701178	#	-0.132800034544144		F	61	#	0.15827596536994706
																							L	62	#	#	#	#	#	#	#	#DIV/0	#	WT	0.10032972548190142	#	-0.6364288397435172	-0.6948072728923929	-0.5986402788541174	#DIV/0	#	0.2142730777887381	#	#		L	62	#	#
																							P	63	-0.07576153357377981	#	#	#	#	#	#	#	#	-0.3751933876665344	-0.12151902413445495	#	WT	-0.3118507223047465	-0.4525122431758794	-0.3928783491312158	-0.07805333035336463	#	#	#		P	63	-0.05353084595226863	#
																							N	64	#	-0.4225490197984362	-0.04021408445697461	#	#DIV/0	-0.4225490197984362	-0.2086691998533551	-0.018856682237307246	-0.08675691787524308	#	#	WT	#	#	#	-0.021403871251187156	0.42254902021582064	#DIV/0	#	-0.1474547582288547		N	64	#	-0.275379595568625
																							K	65	#	#	#	-0.03081735505701895	#	#DIV/0	#	-0.2976102831901362	WT	#	-0.03377997445156472	0.18453177290457703	#	-0.2976102831901362	-0.002155389527700848	-0.12151902413445495	-0.060821183780843315	#	-0.12151902413445495	#		K	65	#	#
																							Q	66	#	#	#	0.43478347663283234	#	#	-0.33711882447380975	#	-0.35560223016782294	-0.04467899390173265	#	#	-0.7982126337593215	WT	-0.5158992220402723	#	#	#	#	#		Q	66	#	#
																							R	67	#	-0.004405625038111581	#	#	#	-0.1610275654181286	-0.012374554709386879	#	#	-0.04048577322523674	#	#	-0.8027602615100422	#	WT	-0.005013455063017786	#	#	#	#		R	67	#	-0.017815293685734132
																							T	68	-0.03966518822550323	#	#	#	-0.12151902413445495	#	#	-0.5664555954827162	#	#	#	-0.2464577607427549	-0.6987554317373852	#	-0.12151902413445495	-0.07805333035336463	WT	#	#	#		T	68	-0.040225379172731494	#
																							V	69	0.018931878652092563	#	-0.32265415324091756	-0.4225490197984362	-0.19790736999790962	-0.2906614232348084	#	0.038485415027771544	#	-0.40027262508728395	#	#	#DIV/0	#	#	#	0.35560223058520746	WT	#	#		V	69	0.06162562022128763	#
																							V	70	-0.012215850347341921	#	-0.7499079541847665	-0.12151902413445495	-0.12151902413445495	-0.4488779585207853	#	0.013994361412714582	#	0.048742691260502444	#	#	#	#	#	#DIV/0	-0.4225490197984362	WT	#	#		V	70	-0.04898321820154808	#
																							N	71	#	#	-0.039931708320951664	-0.12151902413445495	#	#DIV/0	0.07805333077074914	0.013994361412714582	0.040636456977933826	#	#	WT	#	#	#	-0.04637775588857019	-0.12151902413445495	#	#	0.03933226836448939		N	71	#	#
																							V	72	0.05241906005013379	#	#	-0.526298457336798	-0.12151902413445495	0.05457223492122629	#	-0.12151902413445495	#	-0.038544789069691054	-0.07829387008917492	#	#	#	#	0.17951097152952625	#	WT	#	#		V	72	0.028220197427099677	#
																							R	73	#	0.005839186597257829	-0.12151902413445495	#	-0.4225490197984362	-0.000475331409679209	0.01477149522654129	#	#	0.14172241064012644	#	0.17951097152952625	0.22090365668775133	#	WT	-0.0703665016870737	#	#	#	#		R	73	#	0.0006840737291364652
																							N	74	#	-0.12151902413445495	0.028828730322895527	#	#	#	-0.09519008541210579	-0.0347486424772784	-0.10303561844044183	#	#	WT	#	#	#DIV/0	-0.03719813843441909	-0.0703665016870737	#	#	0.05657821761882492		N	74	#	0.5027716548150186
																							G	75	-0.16291170929268003	0.0651653084186504	-0.07731536164240149	#	#	WT	#	#	#	#	#	#	#	#	-0.1610275654181286	0.008391248976526731	#	0.19210009883754672	#	-0.12151902413445495		G	75	-0.15044085896032508	0.06410865191453183
																							M	76	#	#	#	-0.4225490197984362	#	#	#	-0.05224606674707919	-0.04375936522162431	-0.12907216202490088	WT	#	#	#	-0.08933434076305374	#	0.07187709312969674	-0.02246080650613249	#	#		M	76	#DIV/0	#
																							S	77	#	0.03770430963393075	-0.5986402788541174	#	#	-0.006491591293245575	-0.12151902413445495	0.1959013877176956	#	#	#	0.008327046968589094	#	#	-0.14634260785948713	WT	0.08933434118043825	#	#	#		S	77	#	0.01940145081835462
																							L	78	#	#	#	#	#	#	#	#	-0.4225490197984362	WT	0.0586888011160584	#	-0.7736578798057351	-0.7737456249281476	-0.529004350712723	#	#	0.2764209845375826	#	#		L	78	#	#
																							H	79	#	-0.12151902413445495	-0.002332616415246304	#	#DIV/0	#	WT	#	#	-0.05986212307036282	#	-0.1495477477346985	-0.2863292727804472	0.13675899110857637	-0.030526817053842914	0.05457223492122629	#	#	#	0.02390341515477433		H	79	#	0.24749914971171255
																							D	80	-0.16427100455540483	#	WT	-0.16572268662650844	#	0.003419712473844996	0.12151902455183945	#	#	#	#	-0.0013267225506166376	#	#	-0.12151902413445495	#	#	-0.05986212307036282	#	0.09108906874698877		D	80	0.0768029225427374	#
																							C	81	#	WT	#	#	0.021148479434276522	-0.10379025717402333	#	-0.12151902413445495	#	#	#	#	#	#	-0.13506830444152673	-0.015390500731942447	#	#	-0.784276855816029	0.0022631352739027506		C	81	#	WT
																							L	82	-0.12151902413445495	#	#	#	#	#	#	#	#	WT	-0.024609011126398544	#	-0.6212579659065299	-0.5654719156014628	-0.37257504483659754	#	-0.12151902413445495	-0.18366693088329938	#	#		L	82	0.025650400095356178	#
																							M	83	-0.4225490197984362	#	#	#	#	#	#	-0.041525253094158075	-0.10835757807648413	0.06232769961798852	WT	#	#	#	-0.31781366927842314	-0.12151902413445495	0.011971497574033164	-0.02803616642730526	#	#		M	83	-0.275379595568625	#
																							K	84	#	#	-0.4225490197984362	-0.5295143853948352	#	-0.12151902413445495	#	-0.2499460885885763	WT	-0.12151902413445495	-0.12151902413445495	-0.04601826182519777	#	0.17951097152952625	-0.011820254082891866	#	-0.22625437465446796	#	#	#DIV/0		K	84	#	#
																							A	85	WT	#	#	-0.23546237644129173	#	-0.12151902413445495	#	#	#	#	#	#	-0.28424632163215474	#	#	-0.10303561844044183	-0.0831740320582353	-0.1359968475030778	#	#		A	85	WT	#
																							L	86	-0.12151902413445495	#	#	#	#	#	#	#DIV/0	#DIV/0	WT	-0.14634260785948713	#	-0.5971452877671661	-0.47027610322201574	-0.5252113616955838	#	#	-0.12151902413445495	#	#		L	86	0.025650400095356178	#
																							K	87	#	#	0.17951097152952625	-0.05437656228521145	#	#	#	-0.0067994527078410185	WT	#	0.17951097152952625	0.24342072443465726	#	0.05457223492122629	-0.0681844352694412	-0.12151902413445495	0.04481239763206997	#DIV/0	#	#DIV/0		K	87	#	#
																							V	88	-0.038319162006739356	#	#DIV/0	-0.3187203386722432	#	-0.12151902413445495	#	#	#	-0.0703665016870737	0.016783674031826474	#	#	#	#	#	#	WT	-0.12151902413445495	#		V	88	-0.008535336494782358	#
																							R	89	#	-0.7918438470209437	#	#	#	-0.5686770554766741	-0.5316934892235041	#	#	-0.376791529237761	#	#DIV/0	-0.3945202961981926	-0.12151902413445495	WT	-0.26958155958989266	#	#	#	-0.12151902413445495		R	89	#	-0.7485705566598551
																							G	90	-0.0837304632450552	0.17951097152952625	0.10572475736860756	-0.12151902413445495	#	WT	#	#	#	#	#	#	#	#	-0.09924262942330274	0.03877796773799433	#	0.003419712473844996	#	#		G	90	0.1603489739928123	-0.400318332176925
error in relative enrichment
																								gd-1_2hr																							gd-2_2hr
	# = no data available																								A	C	D	E	F	G	H	I	K	L	M	N	P	Q	R	S	T	V	W	Y				A	C
	value = calculated error in relative enrichment																						S	52	#	0.0994158	#	#	#	0.073607	0.112325	0.259605	#	0.277448	#	0.125221	0.475652	0.211958	0.0168638	0.0104341	0.345112	#	#	#		S	52	#	0.103051
																							K	53	#	#	#	0.0874603	#	1.41423	#	#	0.0104341	#	0.104337	0.297516	#	0.468351	0.0881156	#	0.282939	0.81653	#	#		K	53	#	#
																							T	54	0.0856061	#	#	#	#	#	#	0.186535	#	#	#	0.408315	0.244525	#	#	0.135859	0.0104341	#	#	#		T	54	0.0889064	#
																							S	55	#	0.106782	1.15472	#	#	0.0860489	#	0.262873	#	#	#	0.137299	#	#	0.167411	0.0104341	0.459528	1.41423	#	#		S	55	#	0.118643
																							N	56	#	#	0.0848737	#	#	1.41423	0.28902	0.116525	0.352982	#	#	0.0104341	#	#	#	0.0710659	0.238123	#	#	0.102779		N	56	#	#
																							T	57	0.0775885	#	#	#	#	#	#	#	0.296097	1.15472	0.101361	#	0.261422	#	0.34202	0.129872	0.0104341	1.09547	#	#		T	57	0.0851015	#
																							I	58	#	#	#	#	0.129597	#	#	0.0104341	#	0.209787	0.331963	0.226198	#	#	#	0.462969	0.102856	0.102915	#	#		I	58	#	#
																							R	59	#	0.0786587	#	#	#	0.442203	0.121505	#	#	0.193333	#	#	0.251214	#	0.0104341	0.173701	#	#	#	#		R	59	#	0.0865584
																							V	60	0.0768241	#	#	0.190632	#	0.226171	#	#	#	0.242648	0.118173	#	#	#	#	#	1.22477	0.0104341	#	#		V	60	0.0832993	#
																							F	61	#	0.348544	#	#	0.0104341	#	0.866057	0.152718	#	0.0692721	#	#	#	#	#	0.0850953	#	0.371685	#	0.161347		F	61	#	0.352312
																							L	62	#	#	#	#	#	#	#	#	#	0.0104341	0.243544	#	0.115073	0.180402	0.436498	#	#	0.285046	#	#		L	62	#	#
																							P	63	0.324977	#	#	#	#	#	#	#	#	0.113698	#	#	0.0104341	0.202937	0.457797	0.170362	0.224008	#	#	#		P	63	0.349694	#
																							N	64	#	#	0.103994	#	#	#	0.317906	0.172855	0.231243	#	#	0.0104341	#	#	#	0.091436	0.801818	#	#	0.122446		N	64	#	1.22477
																							K	65	#	#	#	0.108359	#	#	#	0.912901	0.0104341	#	0.116682	0.18656	#	0.408315	0.077716	#	0.305831	#	#	#		K	65	#	#
																							Q	66	#	#	#	0.505579	#	#	0.151775	#	0.475652	0.121966	#	#	0.550169	0.0104341	0.119891	#	#	#	#	#		Q	66	#	#
																							R	67	#	0.102724	#	#	#	0.301913	0.11585	#	#	0.21673	#	#	0.491651	#	0.0104341	0.368512	#	#	#	#		R	67	#	0.112228
																							T	68	0.116605	#	#	#	#	#	#	0.22043	#	#	#	0.44102	0.374936	#	#	0.112186	0.0104341	#	#	#		T	68	0.126854	#
																							V	69	0.0888221	#	0.149579	1.22477	0.266034	0.282722	#	0.124236	#	0.390751	#	#	#	#	#	#	0.81653	0.0104341	#	#		V	69	0.0937734	#
																							V	70	0.0768209	#	0.248635	#	0.392302	0.42881	#	0.110686	#	0.259001	#	#	#	#	#	#	1.22477	0.0104341	#	#		V	70	0.0852034	#
																							N	71	#	#	0.110661	#	#	#	0.368808	0.156359	0.133518	#	#	0.0104341	#	#	#	0.101405	0.471462	#	#	0.139589		N	71	#	#
																							V	72	0.0707804	#	#	0.148921	1.41423	0.182723	#	#	#	0.310104	0.149026	#	#	#	#	1.22477	#	0.0104341	#	#		V	72	0.0773376	#
																							R	73	#	0.0990338	0.81653	#	#	0.250591	0.0859517	#	#	0.191966	#	1.22477	0.203992	#	0.0104341	0.171954	#	#	#	#		R	73	#	0.107553
																							N	74	#	1.41423	0.0787152	#	#	#	0.348393	0.132453	0.291889	#	#	0.0104341	#	#	#	0.0831253	0.343671	#	#	0.107737		N	74	#	1.15473
																							G	75	0.25237	0.123846	0.150705	#	#	0.0104341	#	#	#	#	#	#	#	#	0.301913	0.107291	#	0.295718	#	#		G	75	0.275357	0.133408
																							M	76	#	#	#	#	#	#	#	0.118252	0.109795	0.186654	0.0104341	#	#	#	0.272452	#	0.0897635	0.122057	#	#		M	76	#	#
																							S	77	#	0.155696	#	#	#	0.0802161	#	0.33766	#	#	#	0.16261	#	#	0.195399	0.0104341	0.449419	#	#	#		S	77	#	0.16983
																							L	78	#	#	#	#	#	#	#	#	#	0.0104341	0.217931	#	0.116794	0.158139	0.393248	#	#	0.591654	#	#		L	78	#	#
																							H	79	#	0.81653	0.304444	#	#	#	0.0104341	#	#	0.126024	#	0.25424	0.360013	0.117937	0.0828409	0.912901	#	#	#	0.139815		H	79	#	0.73034
																							D	80	0.25649	#	0.0104341	0.260819	#	0.0929132	0.626827	#	#	#	#	0.159801	#	#	#	#	#	0.126024	#	0.291452		D	80	0.243088	#
																							C	81	#	0.0104341	#	#	0.309209	0.202207	#	#	#	#	#	#	#	#	0.0835974	0.0788966	#	#	0.49349	0.136721		C	81	#	0.0113038
																							L	82	#	#	#	#	#	#	#	#	#	0.0104341	0.253654	#	0.111685	0.141603	0.26062	#	1.41423	0.379004	#	#		L	82	#	#
																							M	83	0.866057	#	#	#	#	#	#	0.143653	0.174254	0.149725	0.0104341	#	#	#	0.341961	#	0.0814115	0.08912	#	#		M	83	0.866062	#
																							K	84	#	#	1.22477	0.112181	#	0.707145	#	0.137139	0.0104341	#	1.41423	0.15281	#	0.462969	0.0718341	#	0.402979	#	#	#		K	84	#	#
																							A	85	0.0104341	#	#	0.420687	#	0.392302	#	#	#	#	#	#	0.391744	#	#	0.291889	0.171824	0.182749	#	#		A	85	0.0113038	#
																							L	86	#	#	#	#	#	#	#	#	#	0.0104341	0.33828	#	0.117524	0.121162	0.305019	#	#	0.408315	#	#		L	86	#	#
																							K	87	#	#	1.22477	0.0768877	#	#	#	0.143565	0.0104341	#	1.22477	0.108136	#	0.372751	0.0712713	#	0.334926	#	#	#		K	87	#	#
																							V	88	0.0856036	#	#	0.137288	#	0.267363	#	#	#	0.280639	0.232447	#	#	#	#	#	#	0.0104341	1.41423	#		V	88	0.0914237	#
																							R	89	#	0.160862	#	#	#	0.368468	0.157658	#	#	0.557822	#	#	0.43786	#	0.0104341	0.231358	#	#	#	#		R	89	#	0.177866
																							G	90	0.417489	0.433076	0.223211	0.632499	#	0.0104341	#	#	#	#	#	#	#	#	0.320447	0.173946	#	0.540112	#	#		G	90	0.397039	0.67705
[truncated: 568 more columns]
